# Supplementary material for: Inflammatory panel cytokines are elevated in the neocortex of late-stage Alzheimer’s disease but not Lewy body dementias
Source: PubMed Central journal article supplement (PMC10169342; doi:10.1186/s12974-023-02789-8), 2023-05-08
Supplement: 12974_2023_2789_MOESM1_ESM.pdf [file 12974_2023_2789_MOESM1_ESM.pdf]

**Chai *et al.* Inflammatory markers are elevated in the neocortex of Alzheimer’s Disease but not Lewy Body Dementias**

**Additional file**

**Table S1. Multiple comparisons of each inflammatory marker among diagnostic groups, using non-parametric Kruskal-Wallis ANOVA tests.**

|          |                 | IL-1 $\alpha$ | IFN- $\gamma$ | GM-CSF       | IL-13        | IL-10        | IL-1Ra | IL-8   | IL-12p70 | FGF-2  |
|----------|-----------------|---------------|---------------|--------------|--------------|--------------|--------|--------|----------|--------|
| BA<br>21 | n               | 75            | 75            | 75           | 75           | 75           | 75     | 72     | 75       | 75     |
|          | H               | 12.340        | 8.994         | 10.090       | 14.650       | 7.349        | 1.646  | 1.694  | 4.154    | 1.122  |
|          | $\eta^2$        | 0.132         | 0.084         | 0.100        | 0.164        | 0.061        | -0.019 | -0.019 | 0.016    | -0.026 |
|          | <i>p</i> -value | <b>0.006</b>  | <b>0.029</b>  | <b>0.018</b> | <b>0.002</b> | 0.062        | 0.649  | 0.638  | 0.245    | 0.772  |
|          | <i>q</i> -value | <b>0.028</b>  | <b>0.066</b>  | <b>0.053</b> | <b>0.019</b> | 0.111        | 0.730  | 0.730  | 0.368    | 0.772  |
| BA<br>9  | n               | 62            | 69            | 59           | 74           | 46           |        |        |          |        |
|          | H               | 12.820        | 2.564         | 6.903        | 6.841        | 5.087        |        |        |          |        |
|          | $\eta^2$        | 0.169         | -0.007        | 0.071        | 0.055        | 0.050        | n.a.   | n.a.   | n.a.     | n.a.   |
|          | <i>p</i> -value | <b>0.005</b>  | 0.464         | 0.075        | 0.077        | 0.166        |        |        |          |        |
|          | <i>q</i> -value | <b>0.025</b>  | 0.464         | 0.129        | 0.129        | 0.207        |        |        |          |        |
| BA<br>40 | n               | 87            | 113           | 57           | 112          | 107          |        |        |          |        |
|          | H               | 9.271         | 9.529         | 7.431        | 10.510       | 14.170       |        |        |          |        |
|          | $\eta^2$        | 0.076         | 0.060         | 0.084        | 0.070        | 0.108        | n.a.   | n.a.   | n.a.     | n.a.   |
|          | <i>p</i> -value | <b>0.026</b>  | <b>0.023</b>  | 0.059        | <b>0.015</b> | <b>0.003</b> |        |        |          |        |
|          | <i>q</i> -value | <b>0.032</b>  | <b>0.032</b>  | <b>0.059</b> | <b>0.032</b> | <b>0.014</b> |        |        |          |        |

Abbreviations: BA = Brodmann area, n = number of measurements, H = Kruskal-Wallis H-statistic,  $\eta^2$  = eta squared based on H-statistic:  $(H - k + 1)/(n - k)$  where k = 4 diagnostic groups, n.a. = not applicable.

Bold fonts indicate significant differences between diagnostic groups,  $p < 0.05$  (Kruskal-Wallis test) and  $q < 0.10$  (False Discovery Rate of 10%).

**Table S2. Associations between each inflammatory marker in temporal cortex with diagnostic groups.**

| BA21 marker   |          | Odds Ratio (95% Confidence Interval) |                    |                             |
|---------------|----------|--------------------------------------|--------------------|-----------------------------|
|               |          | PDD                                  | DLB                | AD                          |
| IL1- $\alpha$ | Model I  | 2.51 (0.68, 9.22)                    | 2.76 (0.75, 10.22) | <b>8.36 (2.01, 34.78)</b>   |
|               | Model II | 1 (0.09, 11.35)                      | 0.91 (0.06, 12.87) | 1.89 (0.12, 30.05)          |
| IFN- $\gamma$ | Model I  | 2.32 (0.53, 10.15)                   | 3.09 (0.7, 13.67)  | <b>11.7 (2.17, 63.12)</b>   |
|               | Model II | 0.72 (0.06, 8.2)                     | 1.27 (0.08, 19.08) | 3.15 (0.17, 58.38)          |
| GM-CSF        | Model I  | 3.17 (0.49, 20.68)                   | 4.55 (0.7, 29.67)  | <b>16.56 (2.22, 123.71)</b> |
|               | Model II | 0.76 (0.03, 17.56)                   | 1.05 (0.03, 32.3)  | 2.29 (0.06, 83.16)          |
| IL-13         | Model I  | 3.07 (0.42, 22.47)                   | 3.15 (0.42, 23.35) | <b>38.78 (3.78, 397.88)</b> |
|               | Model II | 0.81 (0.02, 29.83)                   | 0.54 (0.01, 30.66) | 4.6 (0.06, 329.71)          |
| IL-10         | Model I  | 4.1 (0.61, 27.41)                    | 2.5 (0.35, 17.7)   | <b>10.2 (1.36, 76.3)</b>    |
|               | Model II | 3.02 (0.1, 95.59)                    | 0.86 (0.02, 47.75) | 3.47 (0.06, 195.12)         |
| IL-1ra        | Model I  | 0.37 (0.02, 5.91)                    | 0.14 (0.01, 2.41)  | 0.37 (0.02, 8.66)           |
|               | Model II | 0.25 (0, 182.88)                     | 0.08 (0, 92.49)    | 0.18 (0, 300.5)             |
| IL-8          | Model I  | 2.38 (0.41, 13.84)                   | 1.8 (0.29, 10.95)  | 2.23 (0.3, 16.63)           |
|               | Model II | 0.67 (0.01, 30.39)                   | 0.2 (0, 12.68)     | 0.12 (0, 11.18)             |
| IL-12p70      | Model I  | 0.87 (0.11, 7.12)                    | 4.44 (0.61, 32.3)  | 6.04 (0.73, 49.8)           |
|               | Model II | 0.9 (0, 924)                         | 1.83 (0, 2328.01)  | 1.97 (0, 2706.73)           |
| FGF-2         | Model I  | 0.42 (0.02, 7.61)                    | 0.64 (0.04, 11.7)  | 0.32 (0.01, 8.34)           |
|               | Model II | 1.67 (0, 926.9)                      | 3.49 (0, 3561.64)  | 1.12 (0, 1983.26)           |

Abbreviations: PDD = Parkinson's disease with dementia, DLB = dementia with Lewy Bodies, AD = Alzheimer's disease. Inflammatory markers were log-10 transformed. Model I was adjusted for age and gender, while Model II was adjusted for age, gender and duration of dementia.

Bold fonts indicate significant associations between inflammatory marker and diagnostic group ( $p < 0.05$ , multiple multinomial regression analysis with bias-reduction using Firth's penalized maximum likelihood method).

**Table S3. Multiple comparisons of each inflammatory marker in the presence versus absence of neuropathological features, using non-parametric Mann-Whitney U tests.**

|     |                 | IL-1 $\alpha$ | IFN- $\gamma$ | GM-CSF | IL-13        | IL-10        | IL-1Ra | IL-8   | IL-12p70 | FGF-2  |
|-----|-----------------|---------------|---------------|--------|--------------|--------------|--------|--------|----------|--------|
| NFT | n               | 72            | 72            | 72     | 72           | 72           | 72     | 70     | 72       | 72     |
|     | Z               | 2.482         | 1.687         | 1.797  | 2.983        | 2.066        | 1.076  | 0.392  | 1.167    | 0.587  |
|     | $\eta^2$        | 0.087         | 0.040         | 0.045  | 0.125        | 0.060        | 0.016  | 0.002  | 0.019    | 0.005  |
|     | <i>p</i> -value | <b>0.013</b>  | 0.092         | 0.072  | <b>0.003</b> | <b>0.039</b> | 0.282  | 0.695  | 0.243    | 0.557  |
|     | <i>q</i> -value | <b>0.059</b>  | 0.165         | 0.163  | <b>0.026</b> | 0.116        | 0.363  | 0.695  | 0.363    | 0.627  |
| NP  | n               | 69            | 69            | 69     | 69           | 69           | 69     | 67     | 69       | 69     |
|     | Z               | 0.505         | 0.397         | 0.349  | 1.300        | 0.908        | 0.090  | 0.289  | 0.349    | 0.686  |
|     | $\eta^2$        | 0.004         | 0.002         | 0.002  | 0.025        | 0.012        | 0.000  | 0.001  | 0.002    | 0.007  |
|     | <i>p</i> -value | 0.613         | 0.691         | 0.727  | 0.194        | 0.364        | 0.928  | 0.772  | 0.727    | 0.493  |
|     | <i>q</i> -value | 0.869         | 0.869         | 0.869  | 0.869        | 0.869        | 0.928  | 0.869  | 0.869    | 0.869  |
| LB  | n               | 65            | 65            | 65     | 65           | 65           | 65     | 63     | 65       | 65     |
|     | Z               | -0.510        | -0.472        | -0.579 | -0.015       | -0.899       | -0.503 | -0.095 | -0.122   | -0.091 |
|     | $\eta^2$        | 0.004         | 0.003         | 0.005  | 0.000        | 0.013        | 0.004  | 0.000  | 0.000    | 0.000  |
|     | <i>p</i> -value | 0.610         | 0.637         | 0.563  | 0.988        | 0.369        | 0.615  | 0.925  | 0.903    | 0.927  |
|     | <i>q</i> -value | 0.988         | 0.988         | 0.988  | 0.988        | 0.988        | 0.988  | 0.988  | 0.988    | 0.988  |

Abbreviations: NFT = neurofibrillary tangles, NP, neuritic plaques, LB = Lewy bodies, Z = Z-score from Mann-Whitney U test,  $\eta^2$  = eta squared based on Z-statistic:  $Z^2/(n - 1)$ .

Bold fonts indicate significant differences between diagnostic groups,  $p < 0.05$  (Kruskal-Wallis test) and  $q < 0.10$  (False Discovery Rate of 10%).

**Table S4. Associations between each inflammatory marker in temporal cortex with the presence of Moderate/Severe NFT.**

| Log-10 transformed marker (BA21) | Presence of Moderate/Severe NFT               |                                        |
|----------------------------------|-----------------------------------------------|----------------------------------------|
|                                  | Odds ratio (95% Confidence Interval), p-value |                                        |
|                                  | Model I<br>(max n = 21)                       | Model II<br>(max n = 18)               |
| IL-1 $\alpha$                    | <b>3.69 (1.25, 10.9), p = 0.018</b>           | 3.55 (0.95, 13.22), p = 0.059          |
| IFN- $\gamma$                    | <b>4.04 (1.04, 15.6), p = 0.043</b>           | 3.18 (0.67, 15.01), p = 0.144          |
| GM-CSF                           | <b>4.87 (1.07, 22.22), p = 0.041</b>          | 3.98 (0.65, 24.18), p = 0.134          |
| IL-13                            | <b>12.73 (1.84, 88.01), p = 0.010</b>         | <b>25.36 (1.94, 332.24), p = 0.014</b> |
| IL-10                            | 4.68 (0.98, 22.43), p = 0.054                 | 4.39 (0.58, 33.35), p = 0.153          |
| IL-1Ra                           | 6.72 (0.34, 131.96), p = 0.210                | 17.56 (0.53, 576.42), p = 0.108        |
| IL-8                             | 1.03 (0.18, 5.91), p = 0.970                  | 0.57 (0.08, 4.07), p = 0.577           |
| IL-12p70                         | 4.65 (0.77, 28.25), p = 0.095                 | 13.24 (1.22, 143.27), p = 0.033        |
| FGF-2                            | 1.13 (0.08, 17.11), p = 0.928                 | 16.24 (0.4, 652.76), p = 0.139         |

Abbreviations: NFT = neurofibrillary tangles. Inflammatory markers were log-10 transformed. Model I was adjusted for age, gender and presence of Moderate/Severe neuritic plaque, while Model II was adjusted for age, gender, presence of Moderate/Severe neuritic plaque and duration of dementia.

Bold fonts indicate significant associations between inflammatory marker and diagnostic group ( $p < 0.05$ , multiple binary regression analysis).

Figure S1. Pro-inflammatory markers in prefrontal and parietal lobes of AD and LBD

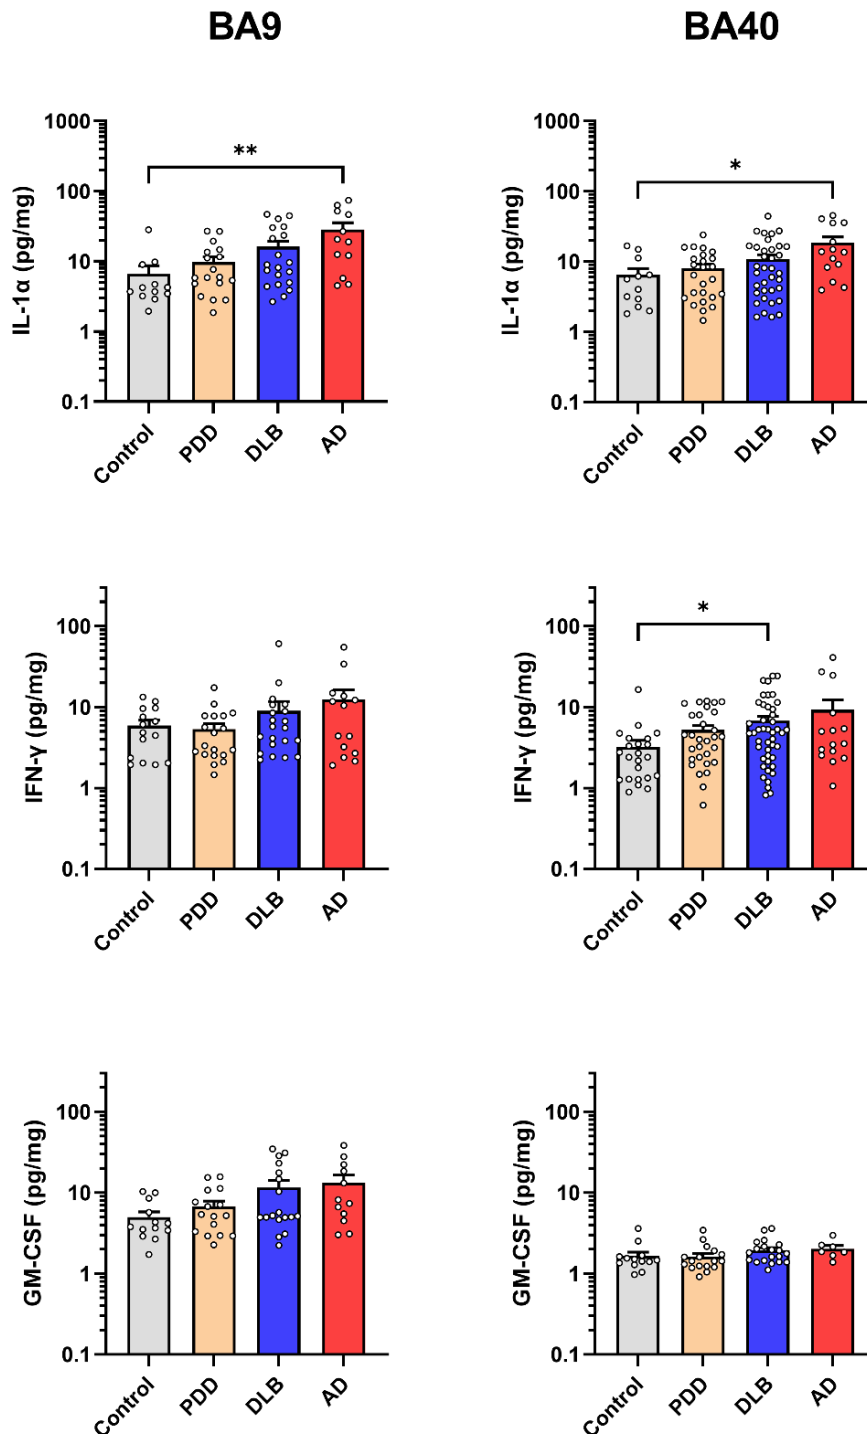

Abbreviations: PDD = Parkinson's disease with dementia, DLB = dementia with Lewy Bodies, AD = Alzheimer's disease. Bar graphs of immunoreactivities (in mean  $\pm$  SEM, with white dots indicating individual measurements) of each inflammatory markers in prefrontal (BA9) and parietal (BA40) lobes of Control, PDD, DLB and AD patients.

\* $p < 0.05$  and \*\* $p < 0.01$  indicate significant differences between diagnostic groups (Dunn-Bonferroni *post hoc* tests correction following a significant Kruskal Wallis ANOVA).

Figure S2. Anti-inflammatory markers in frontal and parietal lobes of AD and LBD

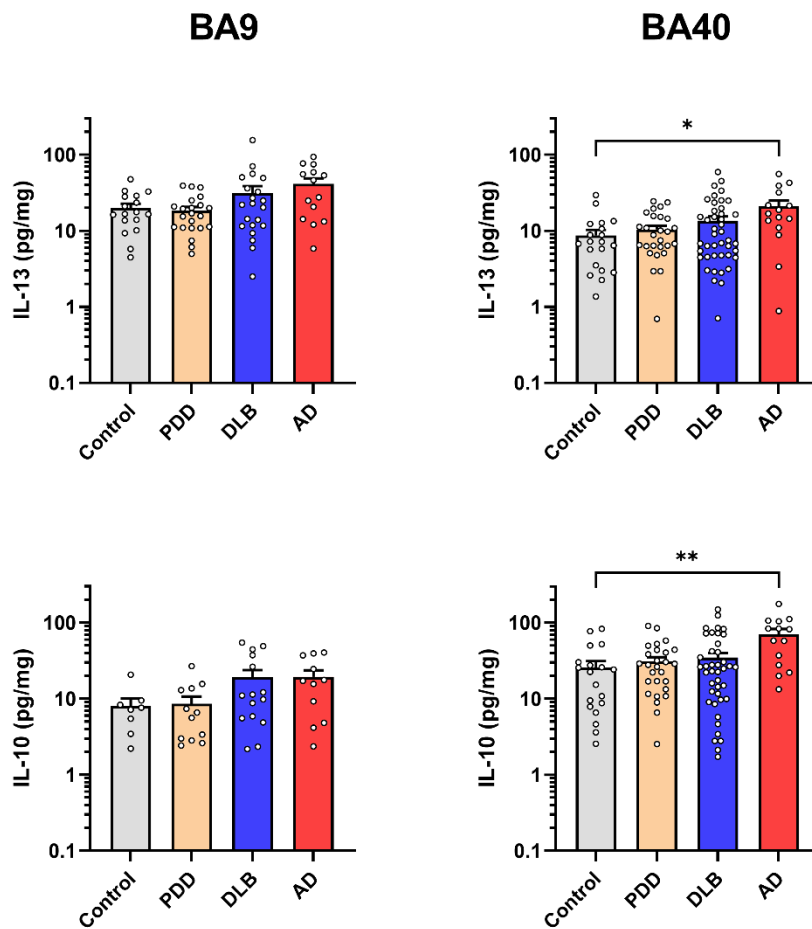

Bar graphs of immunoreactivities (in mean  $\pm$  SEM, with white dots indicating individual measurements) of each inflammatory markers in prefrontal (BA9) and parietal (BA40) lobes of Control, PDD, DLB and AD patients.

\* $p < 0.05$  and \*\* $p < 0.01$  indicate significant differences between diagnostic groups (Dunn-Bonferroni *post hoc* tests correction following a significant Kruskal Wallis ANOVA).
